# Supplementary material for: Conductive molybdenum carbide as the polysulfide reservoir for lithium–sulfur batteries
Source: Royal Society of Chemistry journal article supplement (doi:10.1039/c8ta05904g), 2018-01-01
Supplement: c8ta05904g1.pdf [file c8ta05904g1.pdf]

## Support information

### Conductive Molybdenum Carbide as the Polysulfide Reservoir for Lithium Sulfur Batteries

Xianqing Zeng<sup>a†</sup>, Xuehui Gao<sup>a†</sup>, Gaoran Li<sup>a</sup>, Minghao Sun<sup>a</sup>, Zhan Lin<sup>a</sup>, Min Ling<sup>a\*</sup>, Junchao Zheng<sup>b\*</sup>,  
Chengdu Liang<sup>a\*</sup>

---

<sup>a</sup> Key Laboratory of Biomass Chemical Engineering of Ministry of Education, College of Chemical and Biological Engineering, Zhejiang University, Hangzhou 310027, China, E-mail: minling@zju.edu.cn.

<sup>b</sup> School of Metallurgy and Environment, Central South University, Changsha, China, 410083, China, E-mail: jc Zheng@csu.edu.cn.

† These authors contributed equally to this work.

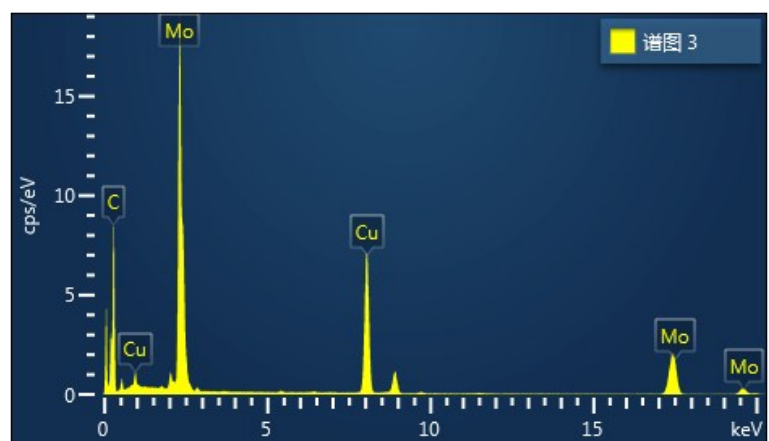

**Fig. S1** EDS result of Mo<sub>2</sub>C nanosheets.

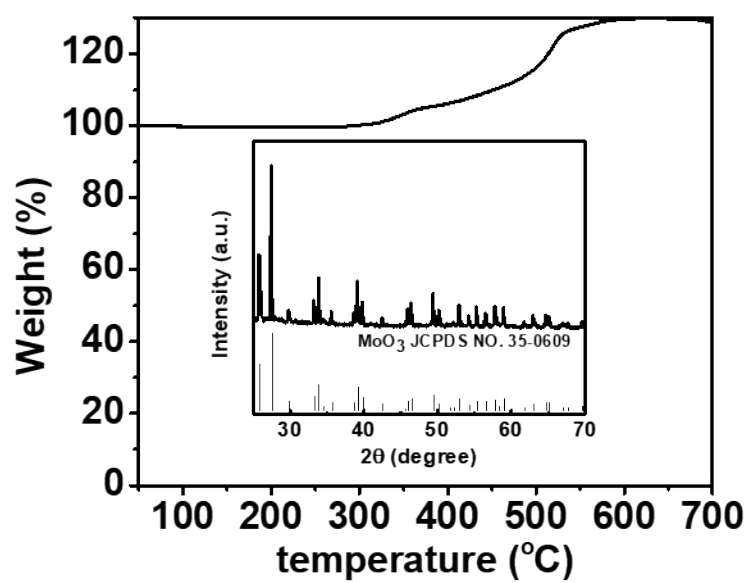

**Fig. S2** TGA curves of Mo<sub>2</sub>C in air atmosphere with a heating rate of 10 °C min<sup>-1</sup> and XRD pattern of MoO<sub>3</sub>.

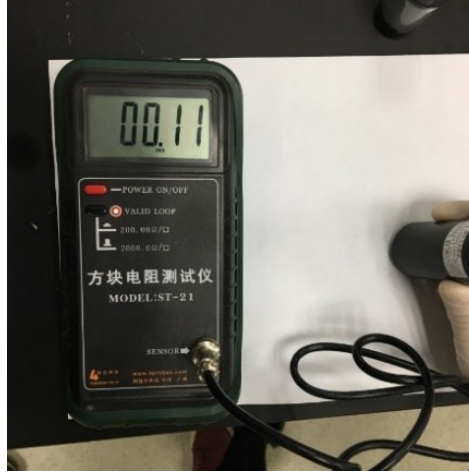

**Fig. S3** A custom-built 4-point probe measurement of the electronic conductivity for Mo<sub>2</sub>C.

The sheet resistance ( $R_s$ ) of the Mo<sub>2</sub>C sample is  $0.11\Omega/\square$ , which tested by the four-point probe technique at room temperature. The thickness ( $t$ ) of the Mo<sub>2</sub>C sample determined by a micrometer is 3 mm. The electronic conductivity ( $C$ ) of the sample is calculated by the following formula:

$$C = \frac{1}{R_s \times t \times 10^{-3}} = \frac{1}{0.11 \times 3 \times 10^{-3}} = 3 \times 10^3 \text{ S m}^{-1}$$

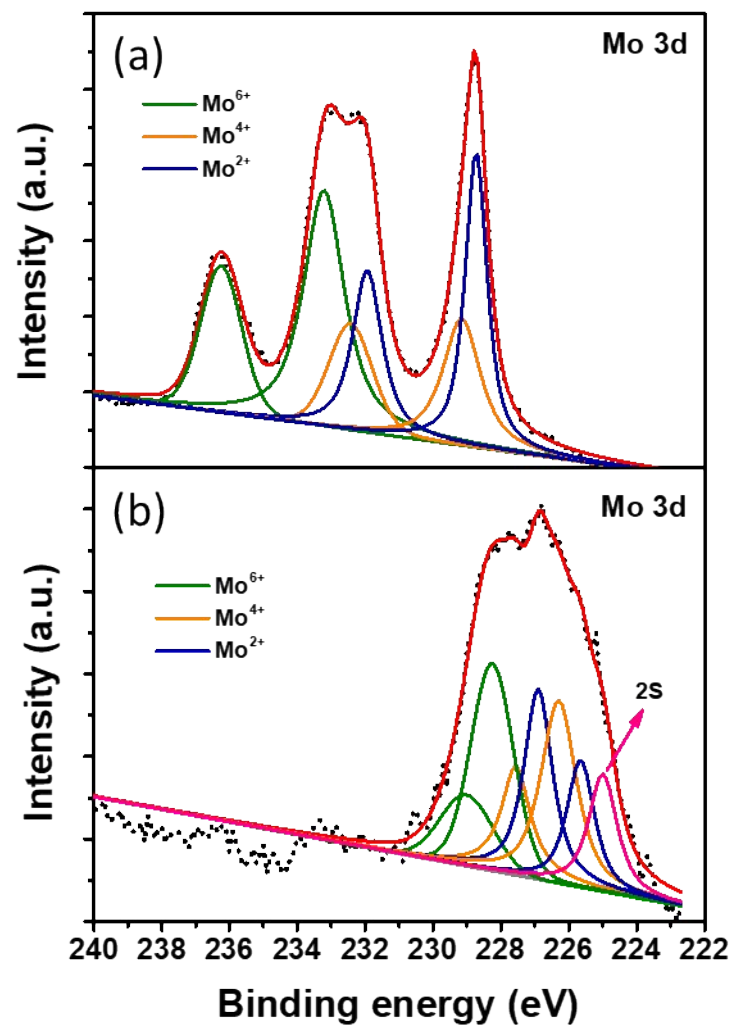

**Fig. S4** Comparison of XPS spectra of element Mo in (a) pure Mo<sub>2</sub>C and (b) Mo<sub>2</sub>C /Li<sub>2</sub>S<sub>6</sub> composites.

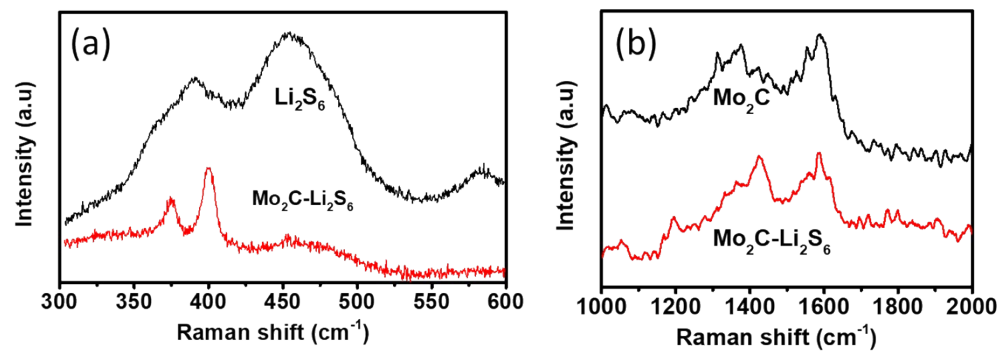

**Fig. S5** Raman spectra of representative (a)  $\text{Li}_2\text{S}_6$  and  $\text{Mo}_2\text{C} / \text{Li}_2\text{S}_6$ , (b)  $\text{Mo}_2\text{C}$  and  $\text{Mo}_2\text{C}/\text{Li}_2\text{S}_6$  to highlight the interaction.

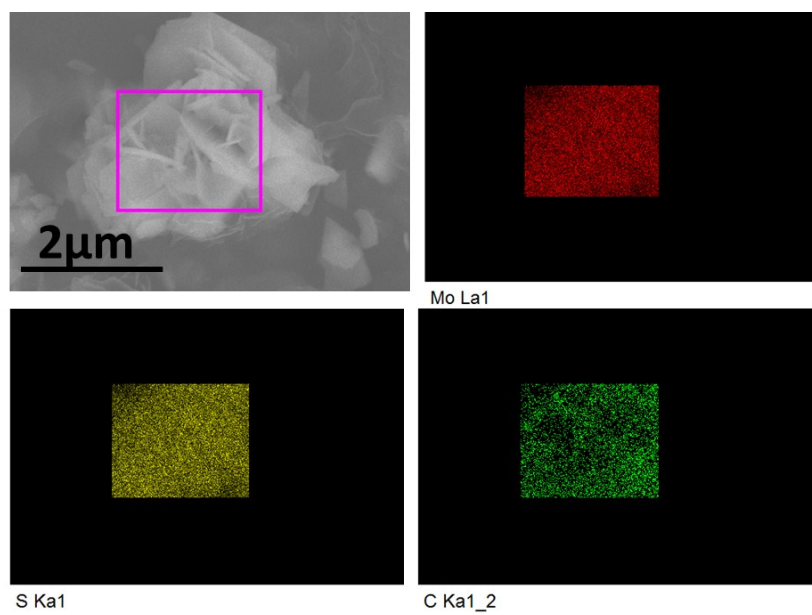

**Fig. S6** SEM image and corresponding EDX elemental mappings of Mo, S and C elements in the S@Mo<sub>2</sub>C composite.

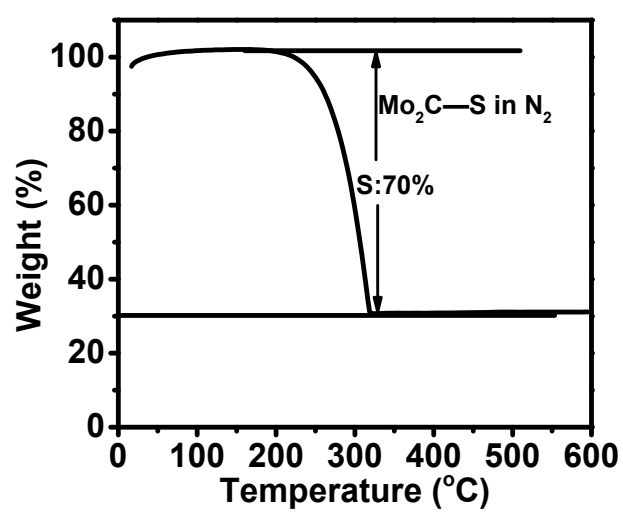

**Fig. S7** TGA curves of S@Mo<sub>2</sub>C in N<sub>2</sub> atmosphere with a heating rate of 10 °C min<sup>-1</sup>.



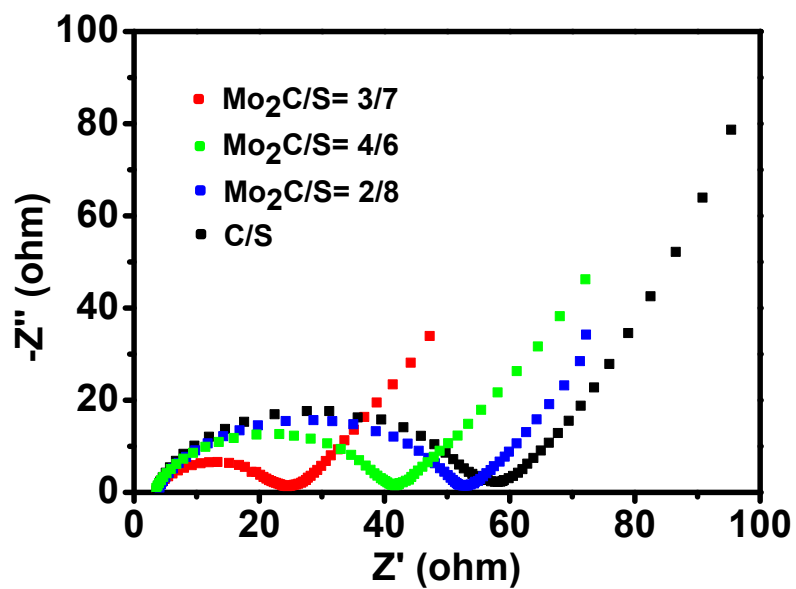

**Fig. S8** Electrochemical impedance spectroscopy of 2Mo<sub>2</sub>C/8S, 3Mo<sub>2</sub>C/7S, 4Mo<sub>2</sub>C/6S and C/S electrode.

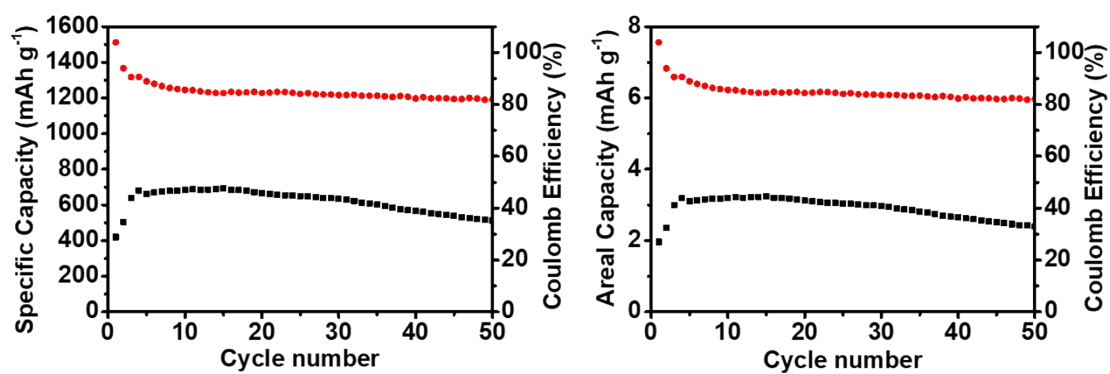

**Fig. S9** (a) Specific capacity and (b) Areal capacity of Mo<sub>2</sub>C at 0.1 C with a high sulfur loadings of 4.68 mg cm<sup>-2</sup>.

**Table S1.** Electrical conductivity of different sulfur host materials.

| Materials                                     | TiO <sub>2</sub>  | Nb <sub>2</sub> O <sub>5</sub> | XC-72<br>carbon | TiN | This work |
|-----------------------------------------------|-------------------|--------------------------------|-----------------|-----|-----------|
| Conductivity<br>( $\times S\text{ cm}^{-1}$ ) | 10 <sup>-10</sup> | 10 <sup>-6</sup>               | 1.5             | 46  | 30        |
